# Supplementary material for: Comparison of COVID-19 and Influenza-Related Outcomes in the United States during Fall–Winter 2022–2023: A Cross-Sectional Retrospective Study
Source: MDPI journal article supplement (doi:10.3390/diseases12010016), 2024-01-03
Supplement: s1 [file s1]

Table S3: Comorbidity burden among patients hospitalized with COVID-19

|                              | Age 0-5                   |       |                               |         |
|------------------------------|---------------------------|-------|-------------------------------|---------|
|                              | Hospitalized*<br>patients |       | All individuals in<br>dataset |         |
|                              | N =                       | 706   | N =                           | 506,690 |
|                              | N                         | %     | N                             | %       |
| No comorbidity               | 262                       | 37.1% | 338,785                       | 66.9%   |
| Cancer                       | 27                        | 3.8%  | 668                           | 0.1%    |
| Cerebrovascular disease      | 15                        | 2.1%  | 1,204                         | 0.2%    |
| Chronic kidney disease       | 11                        | 1.6%  | 422                           | 0.1%    |
| Chronic lung disease         | 78                        | 11.0% | 3,160                         | 0.6%    |
| Chronic liver disease        | <10                       | N/A   | 58                            | 0.0%    |
| Cystic fibrosis              | <10                       | N/A   | 413                           | 0.1%    |
| Diabetes                     | <10                       | N/A   | 710                           | 0.1%    |
| Disability                   | 196                       | 27.8% | 77,142                        | 15.2%   |
| Heart Condition              | 18                        | 2.5%  | 1,062                         | 0.2%    |
| HIV                          | <10                       | N/A   | 29                            | 0.0%    |
| Mental health disorders      | <10                       | N/A   | 702                           | 0.1%    |
| Dementia                     | N/A                       | N/A   | N/A                           | N/A     |
| Obesity (BMI > 30)           | 10                        | 1.4%  | 7,966                         | 1.6%    |
| Other Immunodeficiencies     | 47                        | 6.7%  | 3,962                         | 0.8%    |
| Pregnancy                    | N/A                       | N/A   | N/A                           | N/A     |
| Physical inactivity          | <10                       | N/A   | 183                           | 0.0%    |
| Smoking (current and former) | N/A                       | N/A   | N/A                           | N/A     |
| Solid organ transplant       | <10                       | N/A   | 120                           | 0.0%    |
| Tuberculosis                 | <10                       | N/A   | 30                            | 0.0%    |
| Immunosuppressive medication | 21                        | 3.0%  | 1,606                         | 0.3%    |
| Asthma                       | 151                       | 21.4% | 40,489                        | 8.0%    |
| Neurologic conditions        | 23                        | 3.3%  | 1,166                         | 0.2%    |
| Musculoskeletal conditions   | <10                       | N/A   | 377                           | 0.1%    |
| Hypertension                 | 37                        | 5.2%  | 1,445                         | 0.3%    |
| ADHD                         | <10                       | N/A   | 4,291                         | 0.8%    |
| Cerebral palsy               | 29                        | 4.1%  | 1,480                         | 0.3%    |
| Congenital malformation      | 296                       | 41.9% | 68,519                        | 13.5%   |
| Down syndrome                | 14                        | 2.0%  | 1,242                         | 0.2%    |
| Stem cell transplant         | <10                       | N/A   | 67                            | 0.0%    |

\*cell counts of 1-9 are reported as <10 to ensure data is deidentified. Zeros are reported as zeros.  
ADHD, attention deficit hyperactivity disorder; BMI, body mass index; HIV, human immunodeficiency virus

|                              | Age 6-17                  |       |                               |           |
|------------------------------|---------------------------|-------|-------------------------------|-----------|
|                              | Hospitalized*<br>patients |       | All individuals in<br>dataset |           |
|                              | N =                       | 1,529 | N =                           | 2,794,168 |
|                              | N                         | %     | N                             | %         |
| No comorbidity               | 383                       | 25.0% | 1,789,787                     | 64.1%     |
| Cancer                       | 98                        | 6.4%  | 6,266                         | 0.2%      |
| Cerebrovascular disease      | 48                        | 3.1%  | 3,350                         | 0.1%      |
| Chronic kidney disease       | 43                        | 2.8%  | 2,972                         | 0.1%      |
| Chronic lung disease         | 108                       | 7.1%  | 5,427                         | 0.2%      |
| Chronic liver disease        | 10                        | 0.7%  | 1,136                         | 0.0%      |
| Cystic fibrosis              | 14                        | 0.9%  | 1,214                         | 0.0%      |
| Diabetes                     | 69                        | 4.5%  | 20,212                        | 0.7%      |
| Disability                   | 411                       | 26.9% | 237,885                       | 8.5%      |
| Heart Condition              | 53                        | 3.5%  | 3,976                         | 0.1%      |
| HIV                          | <10                       | N/A   | 242                           | 0.0%      |
| Mental health disorders      | 336                       | 22.0% | 174,464                       | 6.2%      |
| Dementia                     | N/A                       | N/A   | N/A                           | N/A       |
| Obesity (BMI > 30)           | 174                       | 11.4% | 175,954                       | 6.3%      |
| Other Immunodeficiencies     | 148                       | 9.7%  | 6,162                         | 0.2%      |
| Pregnancy                    | N/A                       | N/A   | N/A                           | N/A       |
| Physical inactivity          | <10                       | N/A   | 1,871                         | 0.1%      |
| Smoking (current and former) | N/A                       | N/A   | N/A                           | N/A       |
| Solid organ transplant       | 30                        | 2.0%  | 1,250                         | 0.0%      |
| Tuberculosis                 | 0                         | 0.0%  | 137                           | 0.0%      |
| Immunosuppressive medication | 130                       | 8.5%  | 14,878                        | 0.5%      |
| Asthma                       | 394                       | 25.8% | 303,733                       | 10.9%     |
| Neurologic conditions        | 56                        | 3.7%  | 5,672                         | 0.2%      |
| Musculoskeletal conditions   | 26                        | 1.7%  | 7,961                         | 0.3%      |
| Hypertension                 | 118                       | 7.7%  | 17,596                        | 0.6%      |
| ADHD                         | 315                       | 20.6% | 354,833                       | 12.7%     |
| Cerebral palsy               | 143                       | 9.4%  | 10,353                        | 0.4%      |
| Congenital malformation      | 350                       | 22.9% | 130,976                       | 4.7%      |
| Down syndrome                | 16                        | 1.0%  | 5,749                         | 0.2%      |
| Stem cell transplant         | 12                        | 0.8%  | 555                           | 0.0%      |

\*cell counts of 1-9 are reported as <10 to ensure data is deidentified. Zeros are reported as zeros.  
ADHD, attention deficit hyperactivity disorder; BMI, body mass index; HIV, human immunodeficiency virus

|                              | Age 18-64                 |        |                            |            |
|------------------------------|---------------------------|--------|----------------------------|------------|
|                              | Hospitalized*<br>patients |        | All individuals in dataset |            |
|                              | N =                       | 49,189 | N =                        | 15,454,879 |
|                              | N                         | %      | N                          | %          |
| No comorbidity               | 3,819                     | 7.8%   | 6,164,086                  | 39.9%      |
| Cancer                       | 4,312                     | 8.8%   | 428,136                    | 2.8%       |
| Cerebrovascular disease      | 5,063                     | 10.3%  | 292,406                    | 1.9%       |
| Chronic kidney disease       | 7,805                     | 15.9%  | 347,900                    | 2.3%       |
| Chronic lung disease         | 10,787                    | 21.9%  | 525,818                    | 3.4%       |
| Chronic liver disease        | 2,306                     | 4.7%   | 121,708                    | 0.8%       |
| Cystic fibrosis              | 89                        | 0.2%   | 3,910                      | 0.0%       |
| Diabetes                     | 15,147                    | 30.8%  | 1,762,550                  | 11.4%      |
| Disability                   | 1,131                     | 2.3%   | 153,525                    | 1.0%       |
| Heart Condition              | 11,987                    | 24.4%  | 727,435                    | 4.7%       |
| HIV                          | 751                       | 1.5%   | 78,027                     | 0.5%       |
| Mental health disorders      | 16,459                    | 33.5%  | 2,572,057                  | 16.6%      |
| Dementia                     | 1,605                     | 3.3%   | 52,931                     | 0.3%       |
| Obesity (BMI > 30)           | 19,831                    | 40.3%  | 3,543,618                  | 22.9%      |
| Other Immunodeficiencies     | 2,187                     | 4.4%   | 85,959                     | 0.6%       |
| Pregnancy                    | 9,901                     | 20.1%  | 655,765                    | 4.2%       |
| Physical inactivity          | 139                       | 0.3%   | 12,625                     | 0.1%       |
| Smoking (current and former) | 17,657                    | 35.9%  | 1,999,052                  | 12.9%      |
| Solid organ transplant       | 1,320                     | 2.7%   | 36,212                     | 0.2%       |
| Tuberculosis                 | 74                        | 0.2%   | 4,798                      | 0.0%       |
| Immunosuppressive medication | 3,952                     | 8.0%   | 448,519                    | 2.9%       |
| Asthma                       | 9,546                     | 19.4%  | 1,278,488                  | 8.3%       |
| Neurologic conditions        | 1,782                     | 3.6%   | 117,760                    | 0.8%       |
| Musculoskeletal conditions   | 12,847                    | 26.1%  | 1,885,491                  | 12.2%      |
| Hypertension                 | 24,891                    | 50.6%  | 3,713,659                  | 24.0%      |
| ADHD                         | 2,402                     | 4.9%   | 757,056                    | 4.9%       |
| Cerebral palsy               | 379                       | 0.8%   | 27,729                     | 0.2%       |
| Congenital malformation      | 3,338                     | 6.8%   | 392,380                    | 2.5%       |
| Down syndrome                | 95                        | 0.2%   | 10,815                     | 0.1%       |
| Stem cell transplant         | 157                       | 0.3%   | 4,474                      | 0.0%       |

\*cell counts of 1-9 are reported as <10 to ensure data is deidentified. Zeros are reported as zeros.  
ADHD, attention deficit hyperactivity disorder; BMI, body mass index; HIV, human immunodeficiency virus

|                              | Age 65+                   |        |                               |           |
|------------------------------|---------------------------|--------|-------------------------------|-----------|
|                              | Hospitalized*<br>patients |        | All individuals in<br>dataset |           |
|                              | N =                       | 42,464 | N =                           | 4,770,459 |
|                              | N                         | %      | N                             | %         |
| No comorbidity               | 1,527                     | 3.6%   | 711,992                       | 14.9%     |
| Cancer                       | 8,263                     | 19.5%  | 556,663                       | 11.7%     |
| Cerebrovascular disease      | 10,995                    | 25.9%  | 510,463                       | 10.7%     |
| Chronic kidney disease       | 15,699                    | 37.0%  | 760,873                       | 15.9%     |
| Chronic lung disease         | 16,731                    | 39.4%  | 704,346                       | 14.8%     |
| Chronic liver disease        | 1,517                     | 3.6%   | 69,276                        | 1.5%      |
| Cystic fibrosis              | 13                        | 0.0%   | 441                           | 0.0%      |
| Diabetes                     | 20,931                    | 49.3%  | 1,471,256                     | 30.8%     |
| Disability                   | 319                       | 0.8%   | 14,801                        | 0.3%      |
| Heart Condition              | 22,935                    | 54.0%  | 1,185,761                     | 24.9%     |
| HIV                          | 241                       | 0.6%   | 14,711                        | 0.3%      |
| Mental health disorders      | 12,325                    | 29.0%  | 757,323                       | 15.9%     |
| Dementia                     | 8,802                     | 20.7%  | 314,610                       | 6.6%      |
| Obesity (BMI > 30)           | 14,063                    | 33.1%  | 1,214,499                     | 25.5%     |
| Other Immunodeficiencies     | 1,873                     | 4.4%   | 74,559                        | 1.6%      |
| Pregnancy                    | <10                       | N/A    | 185                           | 0.0%      |
| Physical inactivity          | 143                       | 0.3%   | 5,943                         | 0.1%      |
| Smoking (current and former) | 13,963                    | 32.9%  | 803,421                       | 16.8%     |
| Solid organ transplant       | 776                       | 1.8%   | 17,103                        | 0.4%      |
| Tuberculosis                 | 45                        | 0.1%   | 2,303                         | 0.0%      |
| Immunosuppressive medication | 3,686                     | 8.7%   | 254,136                       | 5.3%      |
| Asthma                       | 5,961                     | 14.0%  | 375,417                       | 7.9%      |
| Neurologic conditions        | 2,803                     | 6.6%   | 113,066                       | 2.4%      |
| Musculoskeletal conditions   | 22,864                    | 53.8%  | 1,878,269                     | 39.4%     |
| Hypertension                 | 36,246                    | 85.4%  | 3,091,563                     | 64.8%     |
| ADHD                         | 209                       | 0.5%   | 23,642                        | 0.5%      |
| Cerebral palsy               | 96                        | 0.2%   | 4,372                         | 0.1%      |
| Congenital malformation      | 2,306                     | 5.4%   | 144,695                       | 3.0%      |
| Down syndrome                | 13                        | 0.0%   | 357                           | 0.0%      |
| Stem cell transplant         | 77                        | 0.2%   | 2,307                         | 0.0%      |

\*cell counts of 1-9 are reported as <10 to ensure data is deidentified. Zeros are reported as zeros.  
ADHD, attention deficit hyperactivity disorder; BMI, body mass index; HIV, human immunodeficiency virus
