# Supplementary material for: Comparison of COVID-19 and Influenza-Related Outcomes in the United States during Fall–Winter 2022–2023: A Cross-Sectional Retrospective Study
Source: MDPI journal article supplement (doi:10.3390/diseases12010016), 2024-01-03
Supplement: s1 [file s1]

Table S1: COVID-19 and influenza code lists

| Condition | Type            | Codes                                                                                                                                                                                                                                                                                                                                              |
|-----------|-----------------|----------------------------------------------------------------------------------------------------------------------------------------------------------------------------------------------------------------------------------------------------------------------------------------------------------------------------------------------------|
| COVID-19  | ICD-10-CM<br>Dx | U071, B342, B9729, Z8616, J1282                                                                                                                                                                                                                                                                                                                    |
|           | ICD10           | U072                                                                                                                                                                                                                                                                                                                                               |
|           | SNOMED          | 840533007, 840539006, 1119302008, 119731000146105, 119741000146102, 119751000146104, 119981000146107, 1240521000000100, 1240531000000100, 1240541000000100, 1240561000000100, 1240581000000100, 674814021000119000, 866151004, 866152006, 870577009, 870588003, 870589006, 870590002, 870591003, 871562009, 1240411000000100, 840536004, 840534001 |
| Influenza | ICD-10-CM<br>Dx | J09, J09x, J09X1, J09X2, J09X3, J09X9, J10, J100, J1000, J1001, J1008, J101, J102, J108, J1081, J1082, J1083, J1089, J11, J110, J1100, J1108, J111, J112, J118, J1181, J1182, J1183, J1189                                                                                                                                                         |
